# Supplementary material for: DeepViral: prediction of novel virus–host interactions from protein sequences and infectious disease phenotypes
Source: PubMed Central journal article supplement (PMC8428617; doi:10.1093/bioinformatics/btab147), 2021-03-03
Supplement: btab147_supplementary_data.pdf [file btab147_supplementary_data.pdf]

# Supplementary materials: DeepViral: prediction of novel virus–host interactions from protein sequences and infectious disease phenotypes

Wang Liu-Wei<sup>1</sup>, Şenay Kafkas<sup>2</sup>, Jun Chen<sup>1</sup>, Nicholas Dimonaco<sup>4</sup>, Jesper Tegnér<sup>1,3</sup>  
and Robert Hoehndorf<sup>1,2,\*</sup>

<sup>1</sup> Computer, Electrical and Mathematical Sciences and Engineering Division, King Abdullah University of Science and Technology, Thuwal 23955, Saudi Arabia,

<sup>2</sup> Computational Bioscience Research Center, King Abdullah University of Science and Technology, Thuwal 23955, Saudi Arabia,

<sup>3</sup> Biological and Environmental Science and Engineering Division, King Abdullah University of Science and Technology, Thuwal 23955, Saudi Arabia.

<sup>4</sup> Institute of Biological, Environmental and Rural Sciences, Aberystwyth University, Aberystwyth, Wales, UK

## 1 Comparison with existing methods

| Method                            | SN (%)       | SP (%)       | ACC (%)      | PPV (%)      | NPV (%)      | MCC          | AUC          | F1 (%)       |
|-----------------------------------|--------------|--------------|--------------|--------------|--------------|--------------|--------------|--------------|
| DeNovo [Eid et al., 2016]         | 80.71        | 83.06        | 81.90        | NA           | NA           | NA           | NA           | NA           |
| VirusHostPPI [Zhou et al., 2018]  | 80.00        | 88.94        | 84.47        | 87.86        | 81.64        | 0.692        | 0.897        | NA           |
| Doc2Vec + RF [Yang et al., 2020]  | <b>90.33</b> | 96.17        | 93.23        | 95.99        | 90.74        | 0.866        | <b>0.981</b> | 93.07        |
| RCNN [Chen et al., 2019]          | 89.88        | 95.58        | 92.73        | 95.38        | 90.46        | 0.857        | 0.974        | 92.52        |
| DeepViral (seq)                   | 89.36        | 96.89        | 93.13        | 96.68        | 90.13        | 0.865        | 0.960        | 92.86        |
| DeepViral (seq + human embedding) | 88.43        | 96.22        | 92.32        | 95.94        | 89.23        | 0.849        | 0.955        | 92.02        |
| DeepViral (seq + viral embedding) | 88.29        | 97.24        | 92.76        | 96.97        | 89.26        | 0.859        | 0.967        | 92.42        |
| DeepViral (joint)                 | 90.27        | <b>97.58</b> | <b>93.91</b> | <b>97.43</b> | <b>90.93</b> | <b>0.881</b> | 0.976        | <b>93.68</b> |

Table 1: Comparison with the state-of-the-art methods on the datasets of [Eid et al., 2016] (the performances of first 3 methods are from the original papers respectively). RCNN and the variants of DeepViral are evaluated 5 times independently to compute the mean of the metrics: SN - sensitivity, SP - specificity, ACC - accuracy, PPV - positive predictive value (precision), NPV - negative predictive value, MCC - Matthews correlation coefficient, AUC - area under the ROC curve. DeepViral (seq) only utilizes the protein sequences and the joint model also includes both the human and virus embeddings as input. The bold numbers represent the best metric for a dataset.

**Implementation details:** The dataset contains 5,020 positives and 4,734 negatives in the training set, and 425 positives and 425 negatives in the testing set. Since no validation set was used previously, we constructed a validation set by randomly sampling 10% of the training set, which was used for choosing the best epoch for RCNN and DeepViral. We truncated all longer sequences than 2,000 amino acids to only the first 2,000 for RCNN, due to the maximum sequence length limit of the model (similarly, first 1,000 amino acids for DeepViral). RCNN and DeepViral (seq) were implemented and evaluated for the entirety of the test set. For DeepViral variants with feature embeddings, a limited number of protein pairs, i.e. 2% of the test set, do not have relevant features available (some proteins are obsolete due to database updates) and thus are excluded from the test set. We evaluated both RCNN and the variants of DeepViral for 5 times and report the mean of the metrics.

## 2 Taxonomic information of Leave-One-Species-Out (LOSO) experiments

| Family           | Val/Test | Strain name                                   | Taxon ID |
|------------------|----------|-----------------------------------------------|----------|
| Coronaviridae    | Val      | SARS-CoV                                      | 694009   |
|                  | Test     | SARS-CoV-2                                    | 2697049  |
| Flaviviridae     | Val      | ZIKV                                          | 64320    |
|                  | Test     | ZIKV/H. sapiens/FrenchPolynesia/10087PF/2013  | 2043570  |
| Orthomyxoviridae | Val      | Influenza A virus (A/Hong Kong/156/97(H5N1))  | 130763   |
|                  | Test     | Influenza A virus (A/Vietnam/1194/2004(H5N1)) | 644788   |
| Papillomaviridae | Val      | Human papillomavirus type 16                  | 333760   |
|                  | Test     | Human papillomavirus type 18                  | 333761   |

Table 2: Taxonomic information of the LOSO experiments. Val - validation set, Test - test set. Taxon IDs are based on the NCBI Taxonomy Database [Sayers et al., 2009].

## References

- [Chen et al., 2019] Chen, M., Ju, C. J.-T., Zhou, G., Chen, X., Zhang, T., Chang, K.-W., Zaniolo, C., and Wang, W. (2019). Multifaceted protein–protein interaction prediction based on siamese residual rnn. *Bioinformatics*, 35(14):i305–i314.
- [Eid et al., 2016] Eid, F.-E., ElHefnawi, M., and Heath, L. S. (2016). Denovo: virus-host sequence-based protein–protein interaction prediction. *Bioinformatics*, 32(8):1144–1150.
- [Sayers et al., 2009] Sayers, E. W., Barrett, T., Benson, D. A., Bryant, S. H., Canese, K., Chetvernin, V., Church, D. M., DiCuccio, M., Edgar, R., Federhen, S., Feolo, M., Geer, L. Y., Helmberg, W., Kapustin, Y., Landsman, D., Lipman, D. J., Madden, T. L., Maglott, D. R., Miller, V., Mizrachi, I., Ostell, J., Pruitt, K. D., Schuler, G. D., Sequeira, E., Sherry, S. T., Shumway, M., Sirotkin, K., Souvorov, A., Starchenko, G., Tatusova, T. A., Wagner, L., Yaschenko, E., and Ye, J. (2009). Database resources of the national center for biotechnology information. *Nucleic Acids Research*, 37(suppl\_1):D5–D15.
- [Yang et al., 2020] Yang, X., Yang, S., Li, Q., Wuchty, S., and Zhang, Z. (2020). Prediction of human-virus protein-protein interactions through a sequence embedding-based machine learning method. *Computational and structural biotechnology journal*, 18:153–161.
- [Zhou et al., 2018] Zhou, X., Park, B., Choi, D., and Han, K. (2018). A generalized approach to predicting protein-protein interactions between virus and host. *BMC genomics*, 19(6):568.
